# Supplementary material for: Strength of association between comorbidities and asthma: a meta-analysis
Source: PubMed Central journal article supplement — Eur Respir Rev. 2023 Mar 8;32(167):220202. doi: 10.1183/16000617.0202-2022 (PMC10032614; doi:10.1183/16000617.0202-2022), 2023-03-08
Supplement: ERR-0202-2022.SUPPLEMENT.pdf [file ERR-0202-2022.SUPPLEMENT.pdf]

## Supplementary tables

**Table S1.** MOOSE Checklist.

| Item No                                     | Recommendation                                                                                                                                                                                                                                                               | Reported on Page No                           |
|---------------------------------------------|------------------------------------------------------------------------------------------------------------------------------------------------------------------------------------------------------------------------------------------------------------------------------|-----------------------------------------------|
| Reporting of background should include      |                                                                                                                                                                                                                                                                              |                                               |
| 1                                           | Problem definition                                                                                                                                                                                                                                                           | 4                                             |
| 2                                           | Hypothesis statement                                                                                                                                                                                                                                                         | 4, 5                                          |
| 3                                           | Description of study outcome(s)                                                                                                                                                                                                                                              | 4, 5                                          |
| 4                                           | Type of exposure or intervention used                                                                                                                                                                                                                                        | 4, 5                                          |
| 5                                           | Type of study designs used                                                                                                                                                                                                                                                   | 4, 5                                          |
| 6                                           | Study population                                                                                                                                                                                                                                                             | 4, 5                                          |
| Reporting of search strategy should include |                                                                                                                                                                                                                                                                              |                                               |
| 7                                           | Qualifications of searchers (eg, librarians and investigators)                                                                                                                                                                                                               | 5                                             |
| 8                                           | Search strategy, including time period included in the synthesis and key words                                                                                                                                                                                               | 5                                             |
| 9                                           | Effort to include all available studies, including contact with authors                                                                                                                                                                                                      | 5                                             |
| 10                                          | Databases and registries searched                                                                                                                                                                                                                                            | 6                                             |
| 11                                          | Search software used, name and version, including special features used (eg, explosion)                                                                                                                                                                                      | 6                                             |
| 12                                          | Use of hand searching (eg, reference lists of obtained articles)                                                                                                                                                                                                             | NA                                            |
| 13                                          | List of citations located and those excluded, including justification                                                                                                                                                                                                        | Fig. 1                                        |
| 14                                          | Method of addressing articles published in languages other than English                                                                                                                                                                                                      | 5                                             |
| 15                                          | Method of handling abstracts and unpublished studies                                                                                                                                                                                                                         | NA                                            |
| 16                                          | Description of any contact with authors                                                                                                                                                                                                                                      | NA                                            |
| Reporting of methods should include         |                                                                                                                                                                                                                                                                              |                                               |
| 17                                          | Description of relevance or appropriateness of studies assembled for assessing the hypothesis to be tested                                                                                                                                                                   | 5                                             |
| 18                                          | Rationale for the selection and coding of data (eg, sound clinical principles or convenience)                                                                                                                                                                                | 5                                             |
| 19                                          | Documentation of how data were classified and coded (eg, multiple raters, blinding and interrater reliability)                                                                                                                                                               | 6                                             |
| 20                                          | Assessment of confounding (eg, comparability of cases and controls in studies where appropriate)                                                                                                                                                                             | 7, 8                                          |
| 21                                          | Assessment of study quality, including blinding of quality assessors, stratification or regression on possible predictors of study results                                                                                                                                   | MS: 7,8;                                      |
| 22                                          | Assessment of heterogeneity                                                                                                                                                                                                                                                  | 8                                             |
| 23                                          | Description of statistical methods (eg, complete description of fixed or random effects models, justification of whether the chosen models account for predictors of study results, dose-response models, or cumulative meta-analysis) in sufficient detail to be replicated | 7 - 9                                         |
| 24                                          | Provision of appropriate tables and graphics                                                                                                                                                                                                                                 | Table 1, Fig. 2-4; Tables S3, S4, Fig. S1-S10 |
| Reporting of results should include         |                                                                                                                                                                                                                                                                              |                                               |
| 25                                          | Graphic summarizing individual study estimates and overall estimate                                                                                                                                                                                                          | Fig. S1-S8                                    |
| 26                                          | Table giving descriptive information for each study included                                                                                                                                                                                                                 | Table 1                                       |

|                                         |                                                                                                                           |                                             |
|-----------------------------------------|---------------------------------------------------------------------------------------------------------------------------|---------------------------------------------|
| 27                                      | Results of sensitivity testing (eg, subgroup analysis)                                                                    | Fig. 4; Table S4, Fig. S8                   |
| 28                                      | Indication of statistical uncertainty of findings                                                                         | Main MS: 14; supplement: 13-17 (Fig. S1-S8) |
| Reporting of discussion should include  |                                                                                                                           |                                             |
| 29                                      | Quantitative assessment of bias (eg, publication bias)                                                                    | 16; Fig. S9, S10                            |
| 30                                      | Justification for exclusion (eg, exclusion of non-English language citations)                                             | Fig. 1                                      |
| 31                                      | Assessment of quality of included studies                                                                                 | 16, Table 1                                 |
| Reporting of conclusions should include |                                                                                                                           |                                             |
| 32                                      | Consideration of alternative explanations for observed results                                                            | 16, 17                                      |
| 33                                      | Generalization of the conclusions (ie, appropriate for the data presented and within the domain of the literature review) | 17                                          |
| 34                                      | Guidelines for future research                                                                                            | 13, 14, 17                                  |
| 35                                      | Disclosure of funding source                                                                                              | 18                                          |

From: Stroup DF, Berlin JA, Morton SC, et al, for the Meta-analysis Of Observational Studies in Epidemiology (MOOSE) Group. Meta-analysis of Observational Studies in Epidemiology. A Proposal for Reporting. *JAMA*. 2000;283(15):2008-2012. doi: 10.1001/jama.283.15.2008.  
MOOSE: Meta-analysis Of Observational Studies in Epidemiology; MS: manuscript; NA: not available.

**Table S2.** Literature search terms used for OVID MEDLINE. The final search strategy applied to conduct this pairwise meta-analysis is reported at step #17.

| #  | Research strategy                                                                        |
|----|------------------------------------------------------------------------------------------|
| 1  | asthma*.mp. [mp=ti, ab, tx, ct, sh, ot, nm, hw, fx, kf, ox, px, rx, an, ui, sy]          |
| 2  | comorbidity*.mp. [mp=ti, ab, tx, ct, sh, ot, nm, hw, fx, kf, ox, px, rx, an, ui, sy]     |
| 3  | real*.mp. [mp=ti, ab, tx, ct, sh, ot, nm, hw, fx, kf, ox, px, rx, an, ui, sy]            |
| 4  | observational*.mp. [mp=ti, ab, tx, ct, sh, ot, nm, hw, fx, kf, ox, px, rx, an, ui, sy]   |
| 5  | cross-sectional*.mp. [mp=ti, ab, tx, ct, sh, ot, nm, hw, fx, kf, ox, px, rx, an, ui, sy] |
| 6  | retrospective*.mp. [mp=ti, ab, tx, ct, sh, ot, nm, hw, fx, kf, ox, px, rx, an, ui, sy]   |
| 7  | prospective*.mp. [mp=ti, ab, tx, ct, sh, ot, nm, hw, fx, kf, ox, px, rx, an, ui, sy]     |
| 8  | cohort*.mp. [mp=ti, ab, tx, ct, sh, ot, nm, hw, fx, kf, ox, px, rx, an, ui, sy]          |
| 9  | children*.mp. [mp=ti, ab, tx, ct, sh, ot, nm, hw, fx, kf, ox, px, rx, an, ui, sy]        |
| 10 | pediatric*.mp. [mp=ti, ab, tx, ct, sh, ot, nm, hw, fx, kf, ox, px, rx, an, ui, sy]       |
| 11 | COVID-19.mp. [mp=ti, ab, tx, ct, sh, ot, nm, hw, fx, kf, ox, px, rx, an, ui, sy]         |
| 12 | SARS-CoV-2.mp. [mp=ti, ab, tx, ct, sh, ot, nm, hw, fx, kf, ox, px, rx, an, ui, sy]       |
| 13 | 3 or 4 or 5 or 6 or 7 or 8                                                               |
| 14 | 9 or 10                                                                                  |
| 15 | 11 or 12                                                                                 |
| 16 | 1 and 2 and 13                                                                           |
| 17 | 16 not (14 and 15)                                                                       |

**Table S3.** ORs and 95%CI for the significant association between comorbidities and asthma reported by single studies that, therefore, did not need to be meta-analyzed.

|                                                | <b>Study and reference</b>     | <b>OR mean (95%CI)</b> |           |
|------------------------------------------------|--------------------------------|------------------------|-----------|
| <b>Allergic and rheumatological disorders:</b> |                                |                        | 95%CI:    |
| Allergic conjunctivitis                        | Toppila-Salmi et al., 2019 (1) | 2.63 (2.22 – 3.11)     | 95%       |
| Allergic reaction                              | Iribarren et al., 2012 (2)     | 2.54 (2.44 – 2.64)     | confide   |
| Allergic urticaria                             | Iribarren et al., 2012 (2)     | 2.39 (2.01 – 2.85)     | nce       |
| Anaphylactic shock                             | Iribarren et al., 2012 (2)     | 1.84 (1.76 – 1.92)     | interval; |
| Angioneurotic edema                            | Iribarren et al., 2012 (2)     | 2.70 (2.47 – 2.96)     | OR:       |
| Eczema or psoriasis                            | Weatherburn et al., 2017 (3)   | 3.30 (3.14 – 3.48)     | odds      |
| Rheumatological disease                        | Weatherburn et al., 2017 (3)   | 1.46 (1.41 – 1.50)     | ratio.    |
| <b>Cardiovascular disorders:</b>               |                                |                        |           |
| Hypertensive cardiopathy                       | Bourdin et al., 2019 (4)       | 4.24 (2.06– 8.90)      |           |
| Pulmonary embolism                             | Cazzola et al., 2011 (5)       | 1.53 (1.29 – 1.81)     |           |
| Pulmonary hypertension                         | Bozek et al., 2016 (6)         | 2.14 (1.22– 3.88)      |           |
| <b>Gastrointestinal disorders:</b>             |                                |                        |           |
| Inflammatory bowel disease                     | Weatherburn et al., 2017 (3)   | 1.47 (1.37 – 1.58)     |           |
| Viral hepatitis                                | Weatherburn et al., 2017 (3)   | 1.60 (1.31 – 1.95)     |           |
| Diverticular disease                           | Weatherburn et al., 2017 (3)   | 1.64 (1.58 – 1.70)     |           |
| Chronic colitis                                | Bozek et al., 2016 (6)         | 1.69 (1.11 – 2.59)     |           |
| Ulcer                                          | Kim et al., 2019 (7)           | 1.94 (1.88 – 2.00)     |           |
| Constipation                                   | Weatherburn et al., 2017 (3)   | 1.61 (1.56 – 1.67)     |           |
| <b>Metabolic disorders:</b>                    |                                |                        |           |
| Thyroid disorders                              | Weatherburn et al., 2017 (3)   | 1.50 (1.46 – 1.54)     |           |
| <b>Musculoskeletal disorders:</b>              |                                |                        |           |
| Lower leg fracture or surgery                  | Chung et al., 2014 (8)         | 1.29 (1.17 – 1.42)     |           |
| <b>Psychiatric and neurological disorders:</b> |                                |                        |           |
| Blindness                                      | Weatherburn et al., 2017 (3)   | 1.19 (1.09 – 1.29)     |           |
| Alzheimer's disease                            | Chen et al., 2014 (9)          | 2.62 (1.96 – 3.49)     |           |
| Anorexia or bulimia                            | Weatherburn et al., 2017 (3)   | 1.42 (1.29 – 1.57)     |           |
| Learning disability                            | Weatherburn et al., 2017 (3)   | 1.28 (1.16 – 1.43)     |           |
| Phobia                                         | Goodwin et al., 2003 (10)      | 2.24 (1.52 – 3.25)     |           |
| Epilepsy                                       | Weatherburn et al., 2017 (3)   | 1.33 (1.24 – 1.42)     |           |
| Deafness                                       | Weatherburn et al., 2017 (3)   | 1.25 (1.21 – 1.29)     |           |
| Suicidal ideation                              | Goodwin et al., 2003 (11)      | 2.25 (1.30 – 3.81)     |           |
| Somatoform disorder                            | Goodwin et al., 2003 (10)      | 1.70 (1.24 – 2.31)     |           |
| Affective disorder                             | Goodwin et al., 2003 (10)      | 1.45 (1.06 – 1.97)     |           |
| <b>Respiratory disorders:</b>                  |                                |                        |           |
| Bronchiectasis                                 | Weatherburn et al., 2017 (3)   | 4.89 (4.48 – 5.34)     |           |
| Pneumonia                                      | Carter et al., 2019 (12)       | 1.40 (1.33 – 1.48)     |           |
| Nasal congestion                               | Sundbom et al., 2013 (13)      | 3.30 (2.96 – 3.67)     |           |
| <b>Other disorders:</b>                        |                                |                        |           |
| Prostate disorders                             | Weatherburn et al., 2017 (3)   | 1.17 (1.10 – 1.25)     |           |
| Cataract                                       | Bourdin et al., 2019 (4)       | 2.37 (1.82 – 3.10)     |           |

**Table S4.** ORs and 95%CI for the significant association between comorbidities and severe asthma reported by single studies that, therefore, did not need to be meta-analyzed.

|                                                | <b>Study and reference</b> | <b>OR mean (95%CI)</b> |
|------------------------------------------------|----------------------------|------------------------|
| <b>Psychiatric and neurological disorders:</b> |                            |                        |
| Bipolar disorder                               | Goodwin et al., 2003 (10)  | 6.16 (2.10 – 15.2)     |
| Phobia                                         | Goodwin et al., 2003 (10)  | 3.56 (1.37 – 7.96)     |
| Panic disorder                                 | Goodwin et al., 2003 (10)  | 2.79 (1.30 – 5.46)     |
| Anxiety                                        | Goodwin et al., 2003 (10)  | 2.30 (1.44 – 3.60)     |
| Depression                                     | Bourdin et al., 2019 (4)   | 1.96 (1.61 – 2.38)     |
| Panic attack                                   | Goodwin et al., 2003 (10)  | 3.16 (1.84 – 5.24)     |
| <b>Respiratory disorders:</b>                  |                            |                        |
| COPD                                           | Varsano et al., 2017 (14)  | 19.27 (15.87 – 23.41)  |
| Allergic rhinitis                              | Luyster et al., 2012 (15)  | 11.71 (5.33 – 26.98)   |
| <b>Metabolic disorders:</b>                    |                            |                        |
| Dyslipidaemia                                  | Bourdin et al., 2019 (4)   | 1.23 (1.02 – 1.48)     |
| Obesity                                        | Bourdin et al., 2019 (4)   | 4.06 (2.99 – 5.51)     |
| <b>Cardiovascular disorders:</b>               |                            |                        |
| Cardiovascular comorbidities                   | Bourdin et al., 2019 (4)   | 2.38 (1.97 – 2.88)     |
| <b>Other disorders:</b>                        |                            |                        |
| Anaemia                                        | Bourdin et al., 2019 (4)   | 1.82 (1.36 – 2.41)     |
| Cataract                                       | Bourdin et al., 2019 (4)   | 2.37 (1.82 – 3.10)     |

COPD: chronic obstructive pulmonary disorder; OR: odds ratio; 95%CI: 95% confidence interval.

# Supplementary figures

## Alcohol use disorder

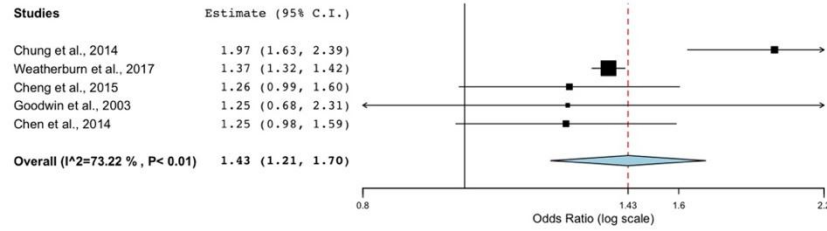

## Anxiety

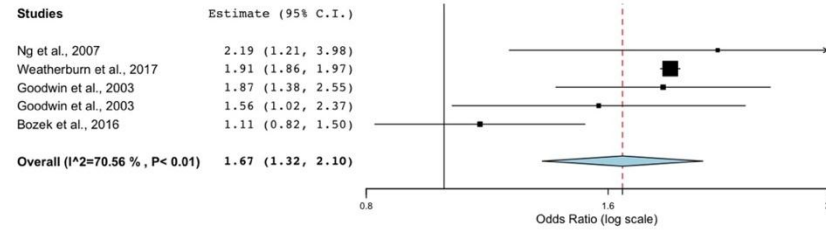

## Depression

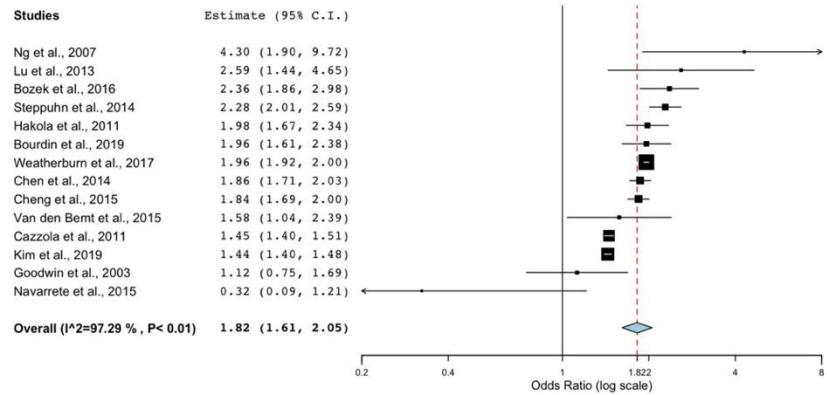

## Drug use disorder

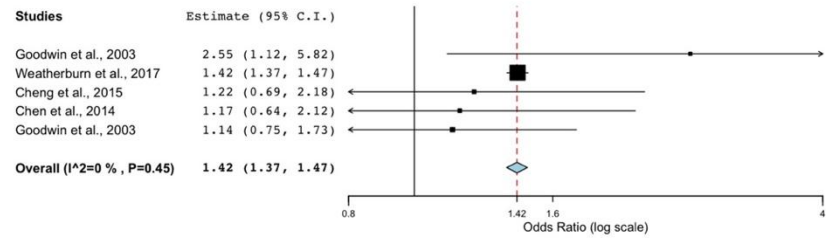

## Migraine

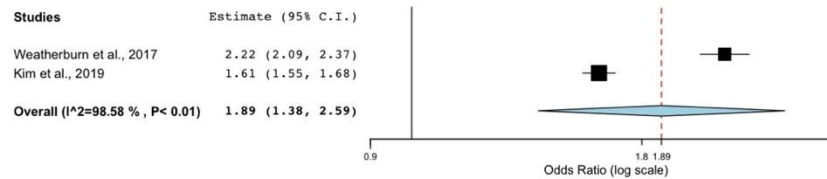

## Panic attacks

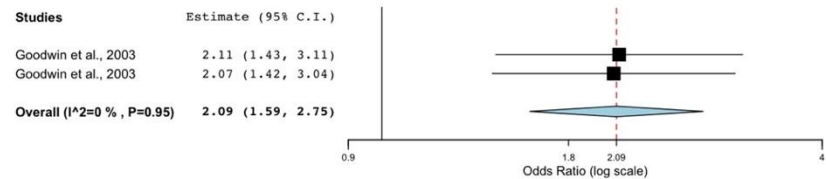

## Psychiatric disorders

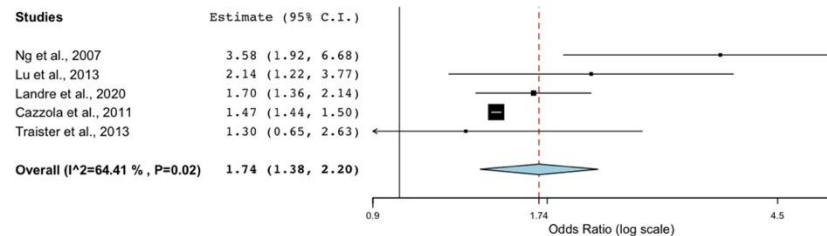

**Figure S1.** Forest plots for the association between significant psychiatric and neurological disorders and asthma.

### Allergic rhinitis

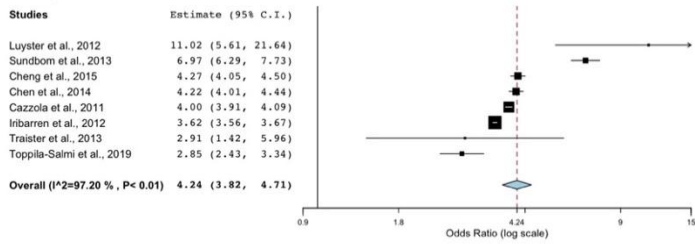

### Chronic respiratory diseases

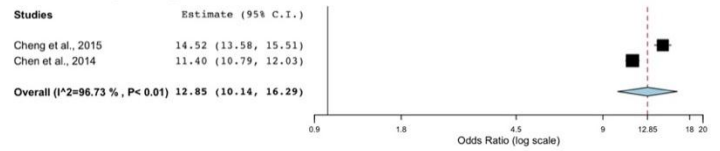

### Chronic sinusitis

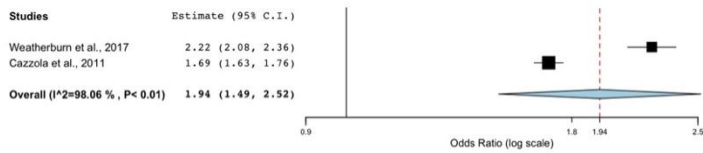

### COPD

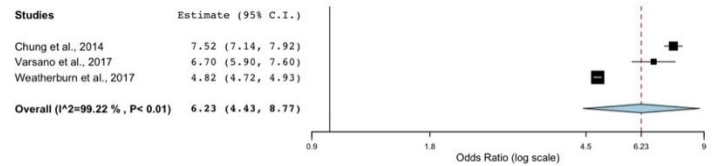

**Figure S2.** Forest plots for the association between significant respiratory disorders and asthma. COPD: chronic obstructive pulmonary disease.

### Dermatitis due to food

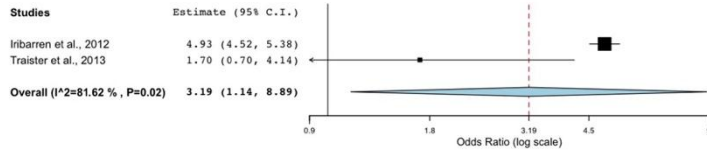

### Atopic dermatitis

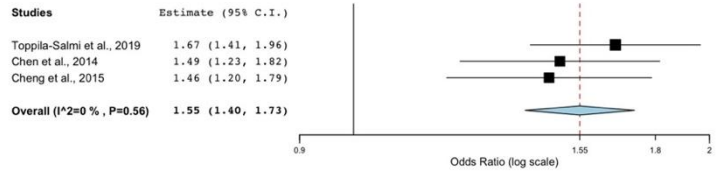

### Allergic rhinitis

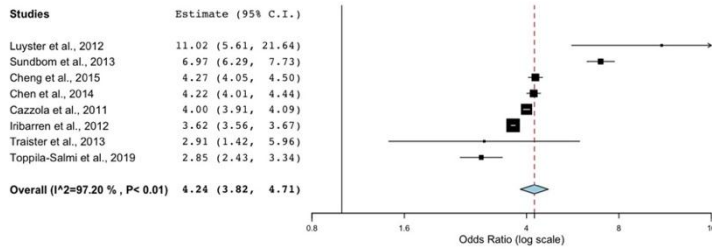

**Figure S3.** Forest plots for the association between significant allergic disorders and asthma.



### Coronary heart disease

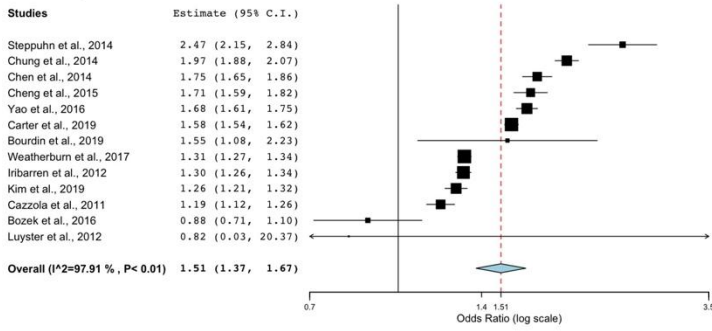

### Cardiovascular comorbidities

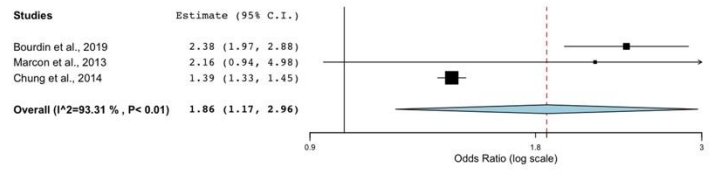

### Heart failure

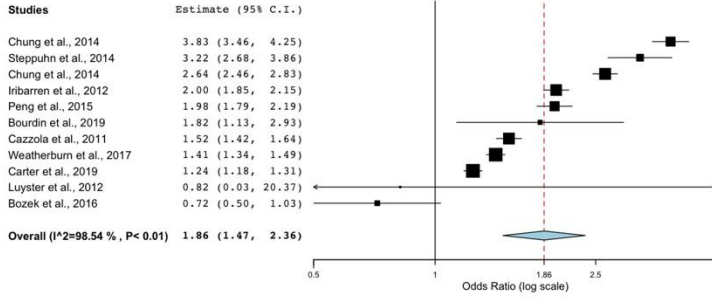

### Hypertension

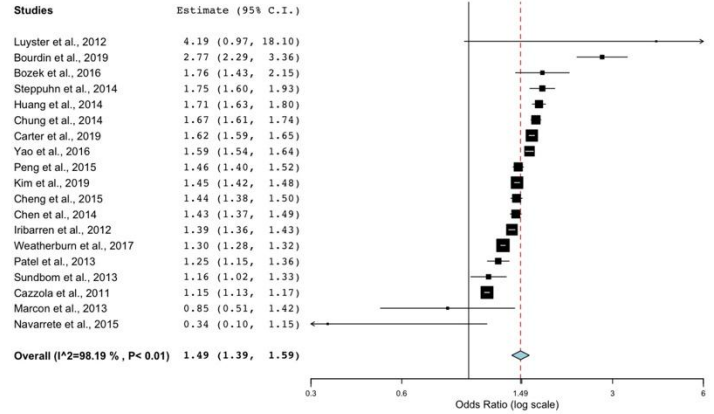

### Stroke

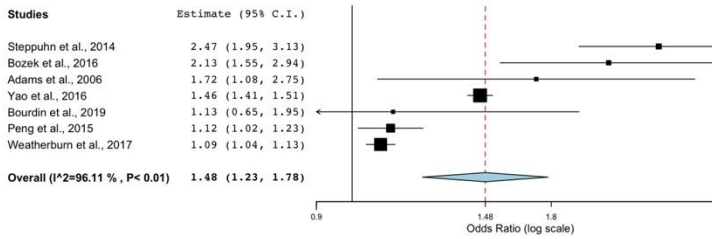

**Figure S4.** Forest plots for the association between cardiovascular disorders and asthma.

### Diabetes

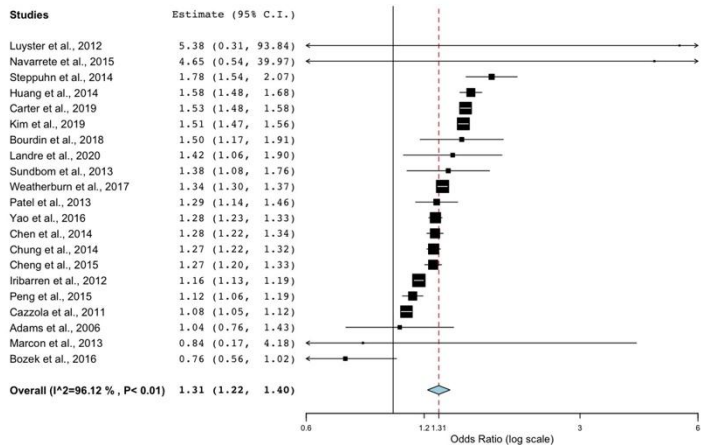

### Dyslipidaemia

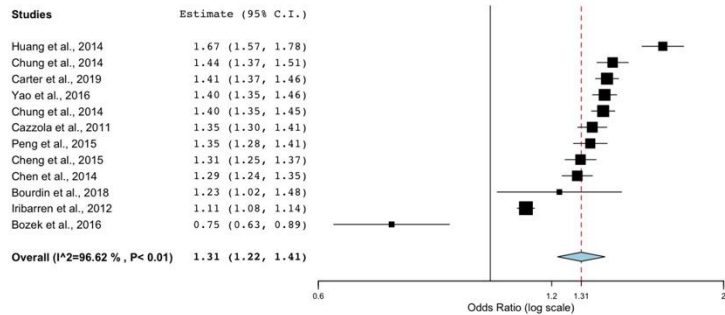

### Obesity

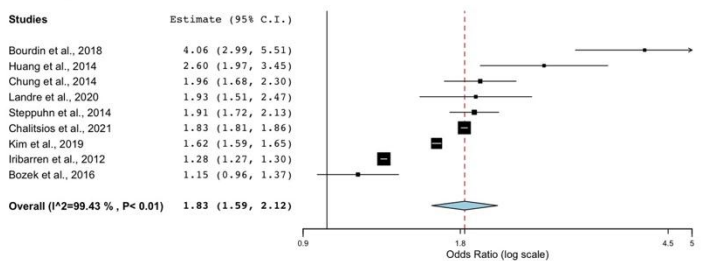

Figure S5. Forest plots for the association between metabolic disorders and asthma.

### GORD

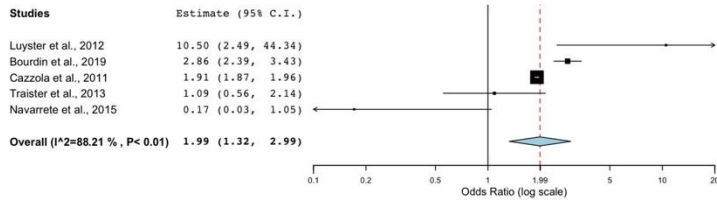

### Irritable bowel syndrome

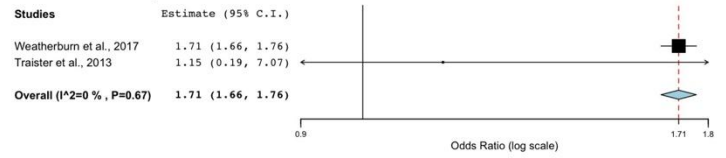

### Arthritis

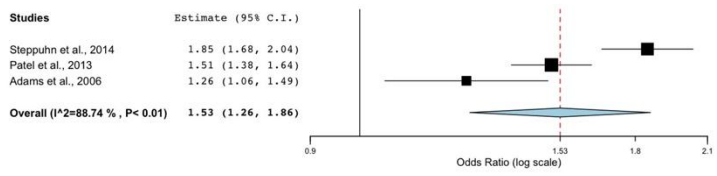

### Osteoporosis

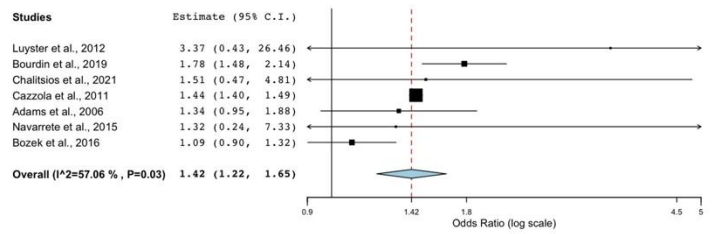

**Figure S6.** Forest plots for the association of gastrointestinal and musculoskeletal disorders with asthma. GORD: gastroesophageal reflux disease.

### Anemia

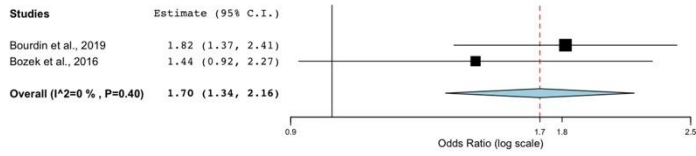

### Cancer

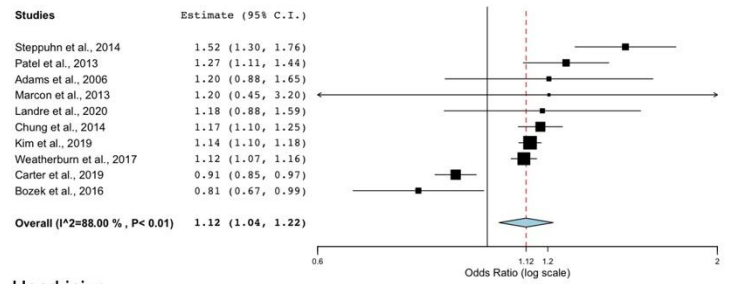

### Glaucoma

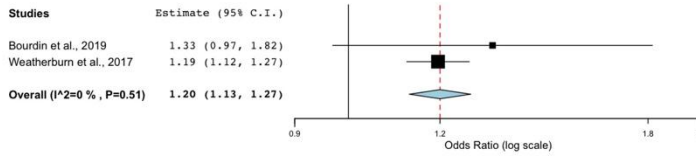

### Head injury

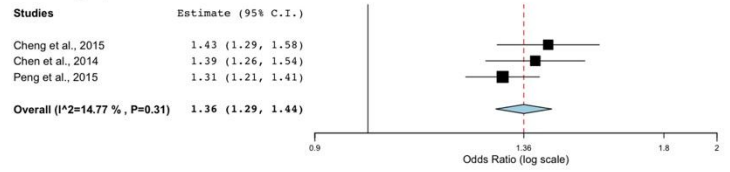

### Pain

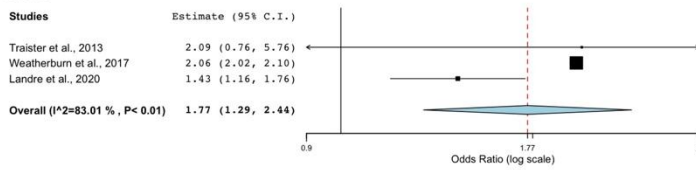

### Renal diseases

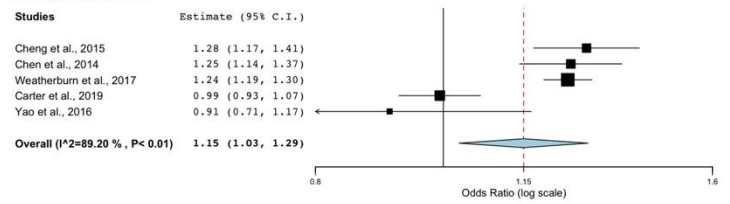

### Sleep disorder

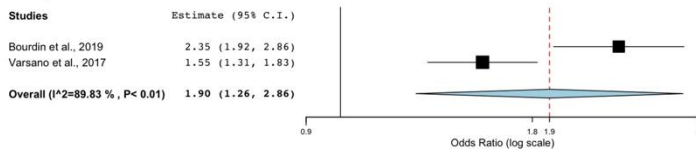

**Figure S7.** Forest plots for the association between other disorders and asthma.

### Coronary heart disease

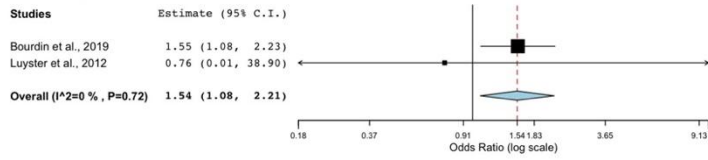

### Heart failure

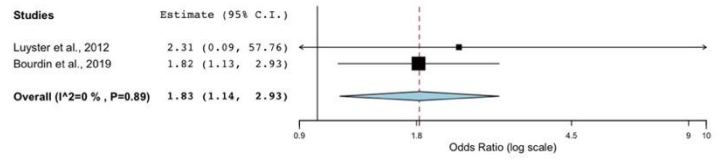

### Hypertension

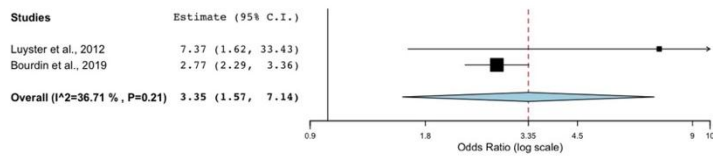

### Sleep disorders

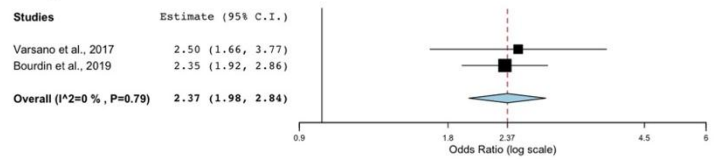

**Figure S8.** Forest plots for the association between coronary heart disease, hypertension, heart failure, sleep disorders and severe asthma.

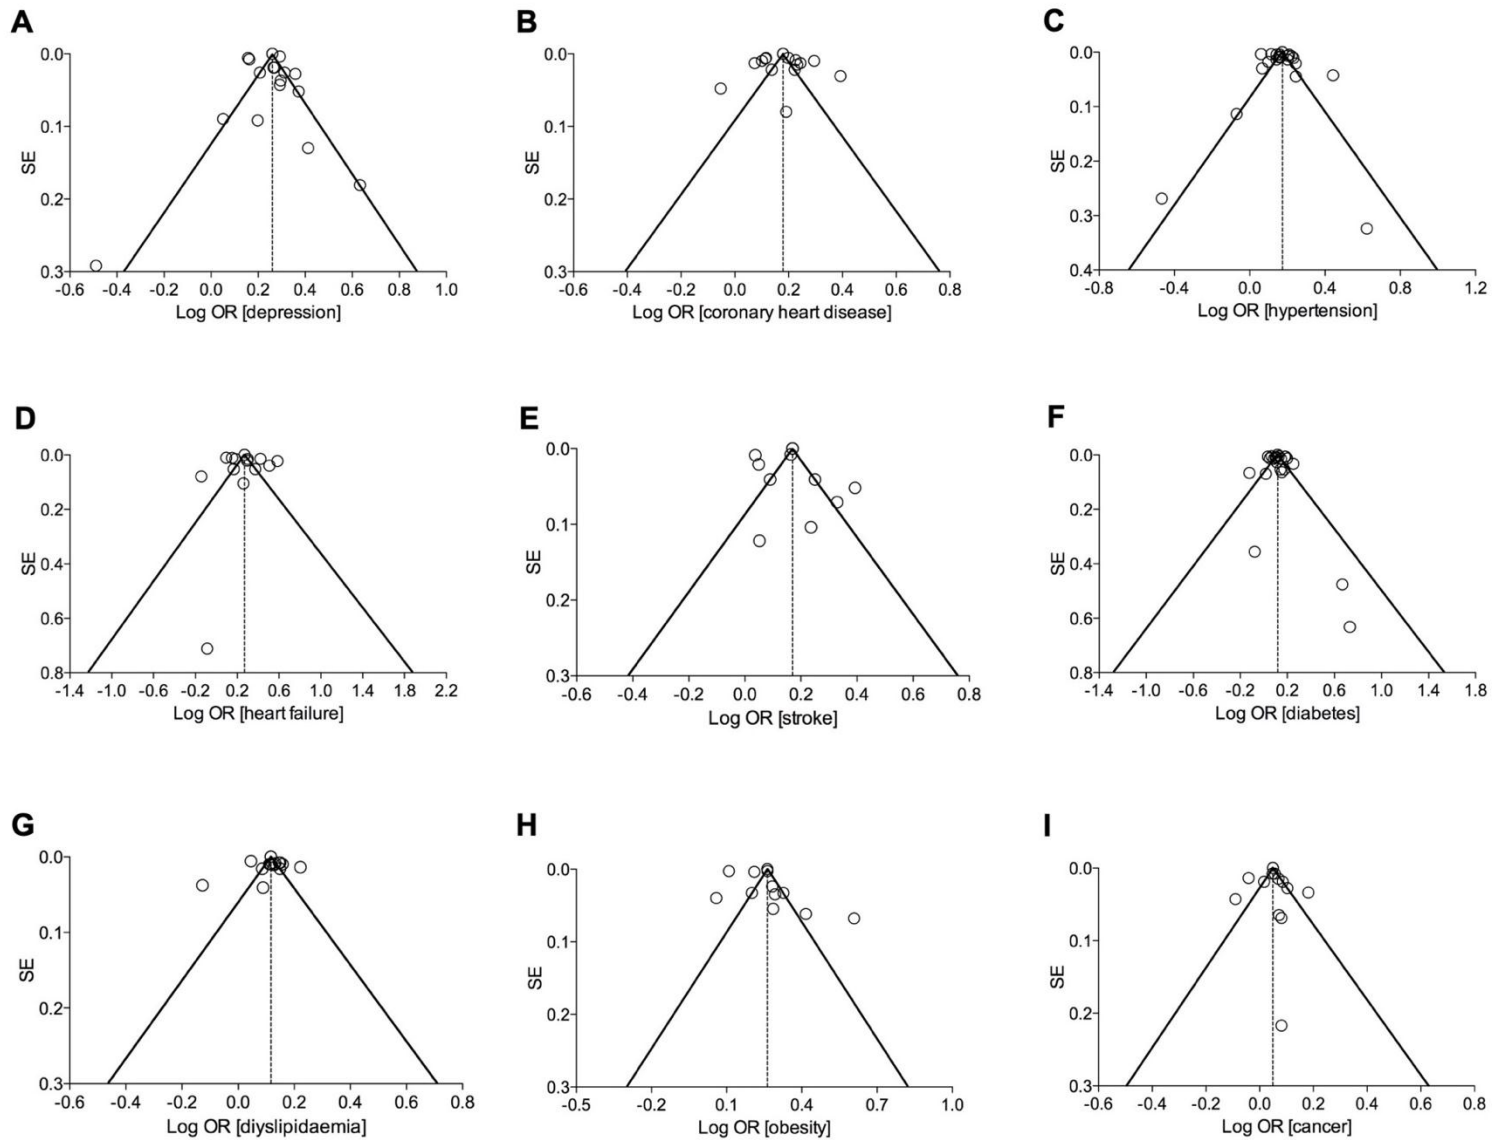

**Figure S9.** Publication bias assessment via funnel plots analysis for the association of depression (A), coronary heart disease (B), hypertension (C), heart failure (D), stroke (E), diabetes (F), dyslipidaemia (G), obesity (H), cancer (I). OR: odds ratio; SE: standard error.

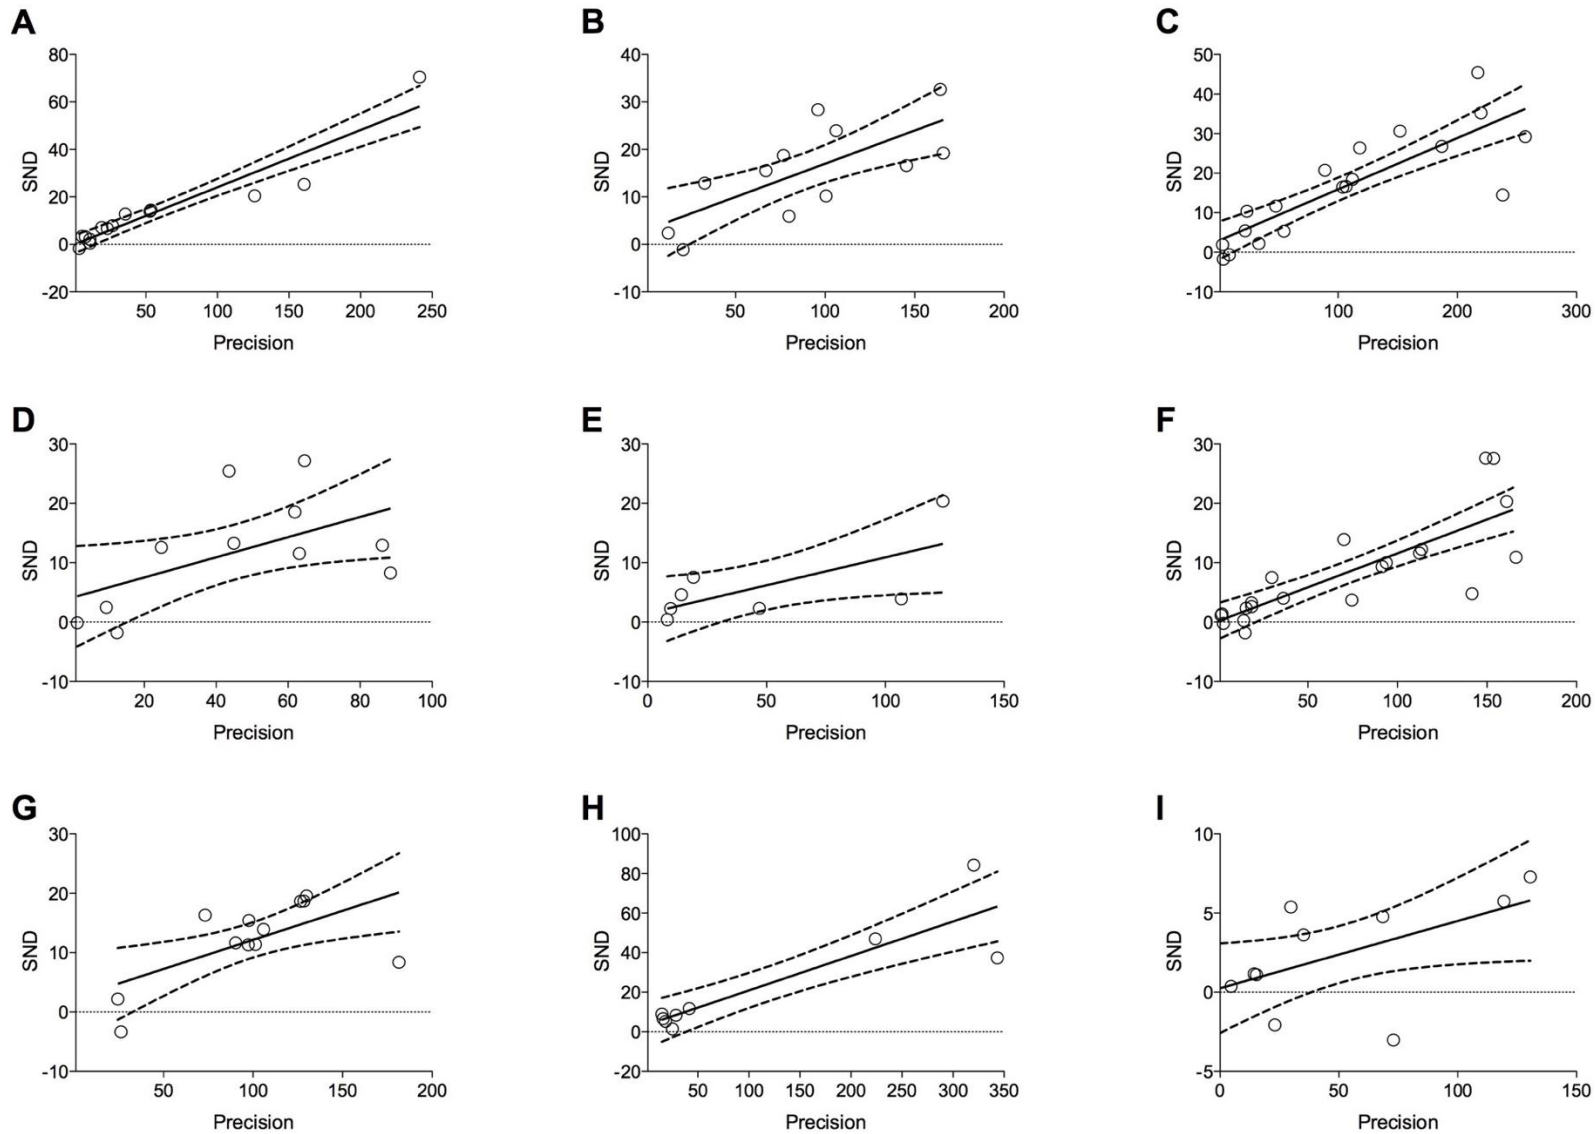

**Figure S10.** Publication bias assessment via Egger's test for the association of depression (A), coronary heart disease (B), hypertension (C), heart failure (D), stroke (E), diabetes (F), dyslipidaemia (G), obesity (H), cancer (I). SND: standard normal deviation.
